# Supplementary material for: Production of Drug Delivery Systems Using Fused Filament Fabrication: A Systematic Review
Source: Pharmaceutics. 2020 Jun 5;12(6):517. doi: 10.3390/pharmaceutics12060517 (PMC7356885; doi:10.3390/pharmaceutics12060517)
Supplement: Supplementary file 1 [file pharmaceutics-12-00517-s001.pdf]

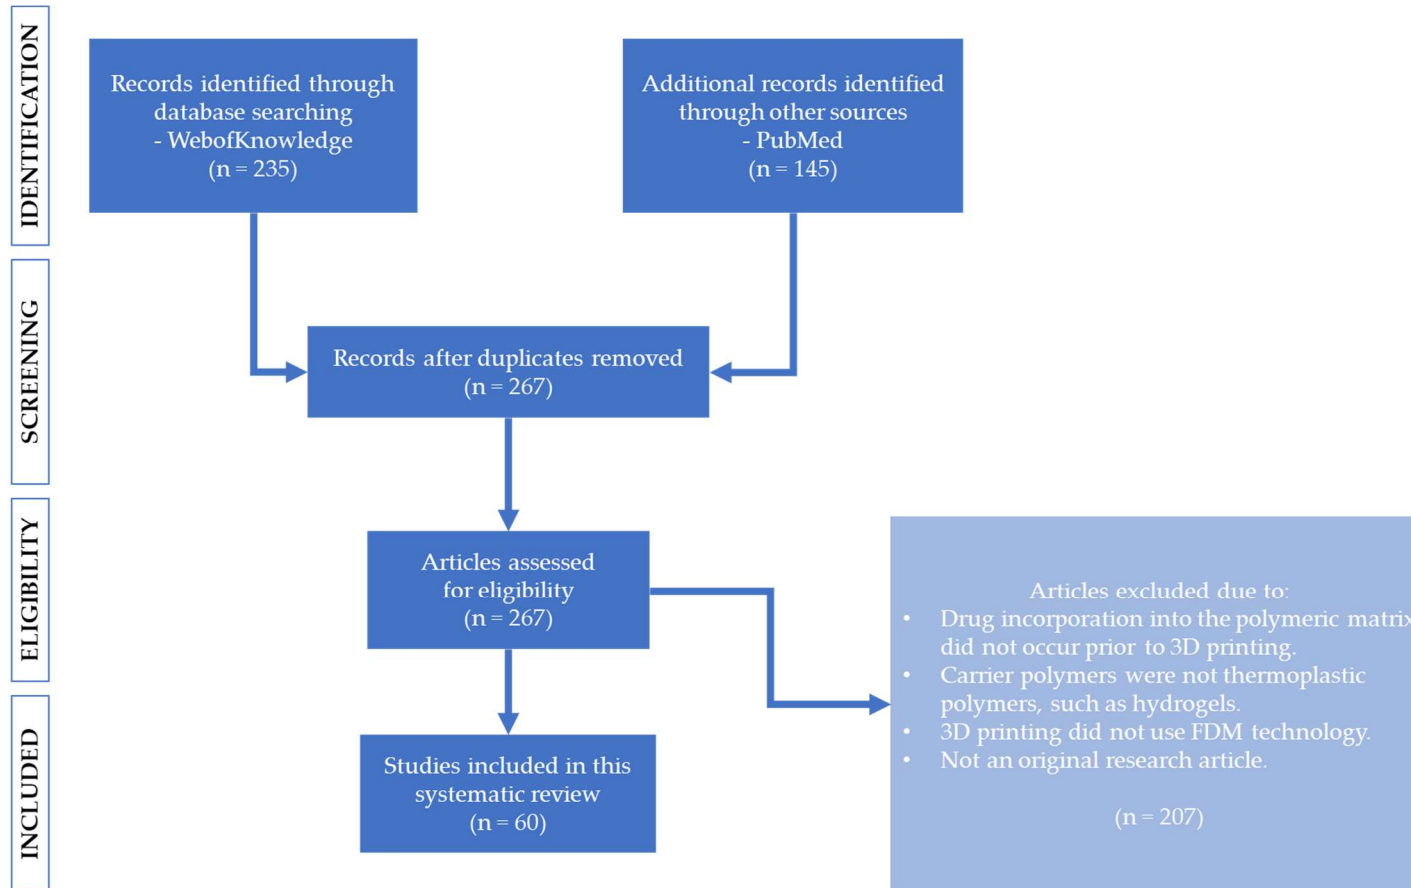

Figure S1. Flowchart diagram of the publications selection process conducted for this systematic review.

Table S1: Summary of the data gathered from publications considered in this systematic review.

| Carrier polymer                                                                  | Physical form | Loaded drug                       | Drug loading amount                 | Drug loading approach                                                                                                                                                                                                        | Processing temperature                 | 3D printer used        | Intended application        | Dosage form | Ref. |
|----------------------------------------------------------------------------------|---------------|-----------------------------------|-------------------------------------|------------------------------------------------------------------------------------------------------------------------------------------------------------------------------------------------------------------------------|----------------------------------------|------------------------|-----------------------------|-------------|------|
| Polycaprolactone (Capa 6506)<br>Kollidon VA64<br>Polyethylene oxide (Mw=300,000) | Powder        | Lovastatin<br>Hydrochlorothiazide | 5% (w/w)                            | Stage 1: Sieved at 250 µm meshes<br><br>Stage 2: Physically mixed for 15 minutes<br><br>Stage 3: HME using a twin extruder<br>Milled and sieved at 250 µm, mixed for 15 minutes<br><br>Note: the process was repeated twice. | HME: 140°C<br>3D printing:160°C        | MakerGear M2           | Oral drug delivery          | Tablets     | [1]  |
| Polyvinyl alcohol                                                                | Filament      | Curcumin                          | 5% (w/w)                            | Stage 1: N/A<br><br>Stage 2: A saturated dispersion was prepared and, in some cases, heated<br><br>Stage 3: The filament was soaked in this solution.                                                                        | 3D printing:210°C                      | Ninjabot FDM-200W      | Oral drug delivery          | Tablets     | [2]  |
| Polypropylene<br>Polyvinyl alcohol                                               | Filament      | Ciprofloxacin HCl                 | 3% (w/w) for PP<br>5% (w/w) for PVA | Stage 1: N/A<br><br>Stage 2: A saturated solution was prepared and, in some cases, heated and stirred or sonicated.<br><br>Stage 3: The filament was soaked in this solution for 12 or 24 hours.                             | 3D printing:190°C (PP),<br>200°C (PVA) | MAKERBOT REPLICATOR 2X | Meshes, treatment of hernia | Implant     | [3]  |

|                                                                                                       |                        |                                                |                                                                                  |                                                                                                                                                                                               |                                                     |                                         |                             |                                      |            |
|-------------------------------------------------------------------------------------------------------|------------------------|------------------------------------------------|----------------------------------------------------------------------------------|-----------------------------------------------------------------------------------------------------------------------------------------------------------------------------------------------|-----------------------------------------------------|-----------------------------------------|-----------------------------|--------------------------------------|------------|
| <p>Polylactic acid (2002D)</p> <p>Polycaprolactone (MW: 80,000)</p> <p>Polyethylene glycol (4000)</p> | <p>Pellets, powder</p> | <p>Clonidine hydrochloride</p>                 | <p>1% (w/w)</p>                                                                  | <p>Stage 1: N/A</p> <p>Stage 2: Drug and polymers were melt-mixed in a heated water bath</p> <p>Stage 3: A single screw extruder was used to produce a filament for 3D printing</p>           | <p>HME: 190°C</p> <p>3D printing: 190°C</p>         | <p>Manli Technology Group CF-12410B</p> | <p>Orthodontic Retainer</p> | <p>Implant</p>                       | <p>[4]</p> |
| <p>Hydroxypropyl cellulose</p> <p>Polyvinylpyrrolidone</p>                                            | <p>Powder</p>          | <p>Itraconazole</p>                            | <p>20% (w/w)</p> <p>All formulations were loaded with efficiency of 100%</p>     | <p>Stage 1: N/A</p> <p>Stage 2: Drug and polymers were physically blended in a bag for 5 minutes</p> <p>Stage 3: A single screw extruder was used to produce the filament for 3D printing</p> | <p>HME: 135°C</p> <p>3D printing: 180°C</p>         | <p>3D Magix MF-2200D</p>                | <p>Oral drug delivery</p>   | <p>Tablets</p>                       | <p>[5]</p> |
| <p>Eudragit EPO</p> <p>POLYOX™ WSR N10</p> <p>POLYOX™ WSR N80</p>                                     | <p>Powder</p>          | <p>Pramipexole dihydrochloride monohydrate</p> | <p>1.3% (w/w)</p> <p>All formulations were loaded with efficiency of 96-101%</p> | <p>Stage 1: N/A</p> <p>Stage 2: Drug and polymer were mixed in mixer for 10 minutes.</p> <p>Stage 3: A single screw extruder was used to produce a filament for 3D printing</p>               | <p>HME: 120-130°C</p> <p>3D printing: 160-175°C</p> | <p>MAKERBOT REPLICATOR 2X</p>           | <p>Oral drug delivery</p>   | <p>Tablets</p>                       | <p>[6]</p> |
| <p>Polylactic acid (Mw: 150,556)</p>                                                                  | <p>Filament</p>        | <p>Prednisolone</p> <p>Dexamethasone</p>       | <p>0.25% (w/w) for prednisolone</p> <p>0.09% (w/w) for dexamethasone</p>         | <p>Stage 1: N/A</p> <p>Stage 2: A saturated solution was prepared.</p> <p>Stage 3: The filament was soaked in the solution for 24 hours at 37°C in an oscillator.</p>                         | <p>3D printing: 220°C</p>                           | <p>REGEMAT 3D V1</p>                    | <p>Tissue regeneration</p>  | <p>Implant, Cylindrical scaffold</p> | <p>[7]</p> |

|                                                                                                   |          |                             |                                                                              |                                                                                                                                                                                                                                                                                                                                                  |                                                   |                        |                    |         |      |
|---------------------------------------------------------------------------------------------------|----------|-----------------------------|------------------------------------------------------------------------------|--------------------------------------------------------------------------------------------------------------------------------------------------------------------------------------------------------------------------------------------------------------------------------------------------------------------------------------------------|---------------------------------------------------|------------------------|--------------------|---------|------|
| Polyvinyl alcohol                                                                                 | Filament | Metformin HCl               | 2% (w/w)                                                                     | <p>Stage 1: N/A</p> <p>Stage 2: A saturated solution was prepared.</p> <p>Stage 3: The filament was soaked in this solution for 3 to 4 days.</p>                                                                                                                                                                                                 | 3D printing: 205°C                                | MAKERBOT REPLICATOR 2X | Oral drug delivery | Tablets | [8]  |
| <p>Polyethylene oxides (Mw: 100K, 200K, 300K, 600K, 900K)</p> <p>Polyethylene glycol (Mw: 6K)</p> | Powder   | Theophylline                | <p>30% (w/w)</p> <p>All formulations were loaded with efficiency of 100%</p> | <p>Stage 1: N/A</p> <p>Stage 2: Drug and the polymer were melt-mixed in a twin screw extruder for 5 minutes.</p> <p>Stage 3: The mixed materials were extruded to produce filament for 3D printing</p>                                                                                                                                           | <p>HME: 60-80°C</p> <p>3D printing: 105-145°C</p> | MAKERBOT REPLICATOR 2X | Oral drug delivery | Tablets | [9]  |
| Polyvinyl alcohol, Ultimaker filament                                                             | Filament | Ciprofloxacin hydrochloride | 10%-35% (w/w)                                                                | <p>Stage 1: The filament was crushed to produce pellets/particle ranging from 5000-250 µm</p> <p>Stage 2: Drug and polymer were physically mixed in a balloon and in some cases a Dibutyl Sebacate was used to improve adhesion.</p> <p>Stage 3: The mixture was extruded using a single screw extruder to produce filament for 3D printing.</p> | <p>HME: 160-175°C</p> <p>3D printing: 195°C</p>   | Ultimaker 3            | Oral drug delivery | Tablets | [10] |

|                                                                                                                                             |        |              |                                                                   |                                                                                                                                                                                                                             |                                                     |                        |                    |         |      |
|---------------------------------------------------------------------------------------------------------------------------------------------|--------|--------------|-------------------------------------------------------------------|-----------------------------------------------------------------------------------------------------------------------------------------------------------------------------------------------------------------------------|-----------------------------------------------------|------------------------|--------------------|---------|------|
| <p>AFFINISOL™ HPMC HME 15lv</p> <p>CARBOWAX™ (PEG 8000)</p> <p>Polyethylene oxide (Mw: 100,000), PEO-L (Mw:2,000,000)</p>                   | Powder | Theophylline | <p>14%-35% (w/w)</p> <p>Drug loading efficacy was around 100%</p> | <p>Stage 1: N/A</p> <p>Stage 2: Drug and polymer were physically mixed.</p> <p>Stage 3: A twin screw extruder was used to produce filament for 3D printing</p>                                                              | <p>HME: 120-170°C</p> <p>3D printing: 110-210°C</p> | Ultimaker 3            | Oral drug delivery | Tablets | [11] |
| <p>Polycaprolactone (Capa 6506)</p> <p>Kollidon VA64</p> <p>Polyethylene oxide (Mw: 300,000)</p>                                            | Powder | Caffeine     | <p>5% (w/w)</p> <p>Drug loading efficacy was around 100%</p>      | <p>Stage 1: Polymer were sieved with a 450 µm mesh.</p> <p>Stage 2: Drug and polymer were mixed using a mixer for 15 minutes at 50 rpm.</p> <p>Stage 3: A twin extruder was used to produce a filament for 3D printing.</p> | <p>HME: 80-140°C</p> <p>3D printing: 150°C</p>      | MAKERBOT REPLICATOR 2X | Oral drug delivery | Tablets | [12] |
| <p>Hydroxypropyl methylcellulose</p> <p>Affinisol HME 15LV</p> <p>Kollidon SR</p> <p>Eudragit E PO (EPO)</p> <p>hydroxypropyl cellulose</p> | Powder | Carvedilol   | <p>20% (w/w)</p>                                                  | <p>Stage 1: N/A</p> <p>Stage 2: Drug and polymers were mixed in mortar and pestle.</p> <p>Stage 3: A twin extruder was used to produce filament for 3D printing</p>                                                         | <p>HME: 130 C</p> <p>3D printing: 135-200 C</p>     | CraftBot Plus          | Oral drug delivery | Tablets | [13] |

|                                                                                                                                                                                                                            |        |                         |                                                          |                                                                                                                                                                                                                   |                                          |                        |                    |         |      |
|----------------------------------------------------------------------------------------------------------------------------------------------------------------------------------------------------------------------------|--------|-------------------------|----------------------------------------------------------|-------------------------------------------------------------------------------------------------------------------------------------------------------------------------------------------------------------------|------------------------------------------|------------------------|--------------------|---------|------|
| Parteck MXP<br>Sorbitol (Parteck SI 150),                                                                                                                                                                                  | Powder | Baclofen                | 10% (w/w)                                                | Stage 1: N/A<br><br>Stage 2: Drug and polymers were mixed using a mortar and pestle and then physically blended using a mixer.<br><br>Stage 3: A twin screw extruder was used to produce filament for 3D printing | HME: 160°C<br>3D printing: 190°C         | MAKERBOT REPLICATOR 2X | Oral drug delivery | Tablets | [14] |
| Parteck MXP<br>Sorbitol (Parteck SI 150)<br><br>Hydroxypropyl cellulose (Klucel)<br><br>Kollidon VA64<br><br>Affinisol™15LV                                                                                                | Powder | Metformin hydrochloride | 5%, 10% (w/w)                                            | Stage 1: N/A<br><br>Stage 2: Drug and polymer were mixed using mortar and pestle and then physically blended using a mixer.<br><br>Stage 3: A twin screw extruder was used to produce filament for 3D printing    | HME: 140-170°C<br>3D printing: 200°C     | MAKERBOT REPLICATOR 2X | Oral drug delivery | Tablets | [15] |
| Hydroxypropylmethylcellulose (Benecel E5, K100M)<br><br>Hydroxypropylcellulose (Klucel EF, HF)<br><br>Polyethylene oxide (Sentry Polyox WSR N-80 NF, Sentry™ Polyox™ WSR N-750 NF)<br><br>Eudragit® RS PO, RL PO and L 100 | Powder | Isoniazid               | 30% (w/w)<br><br>Drug loading efficiency was around 100% | Stage 1: N/A<br><br>Stage 2: Drug and polymers were physically blended using a mixer.<br><br>Stage 3: A twin screw extruder was used to produce filament for 3D printing                                          | HME: 100-155°C<br>3D printing: 165-195°C | MAKERBOT REPLICATOR 2X | Oral drug delivery | Tablets | [16] |

|                                                                                                                                                                                                                               |         |                                              |                                                                         |                                                                                                                                                                                                                                                                                          |                                        |                        |                         |                                                |      |
|-------------------------------------------------------------------------------------------------------------------------------------------------------------------------------------------------------------------------------|---------|----------------------------------------------|-------------------------------------------------------------------------|------------------------------------------------------------------------------------------------------------------------------------------------------------------------------------------------------------------------------------------------------------------------------------------|----------------------------------------|------------------------|-------------------------|------------------------------------------------|------|
| Polyethylene glycol (Mw: 6000)<br><br>Polyvinylpyrrolidone (k-value 12)<br><br>Polycaprolactone (Mw: 14,000)<br><br>Cellulose acetate phthalate (CAP)<br><br>Eudragit L100-55<br><br>Hydroxypropyl methyl cellulose phthalate | Powder  | Pantoprazole sodium                          | 10% (w/w)                                                               | Stage 1: N/A<br><br>Stage 2: Drug and polymer were mixed using mortar and pestle.<br><br>Stage 3: Filament for 3D printing was producing using two methods: 1) A twin extruder was used and 2) a self-made piston extruder.                                                              | HME: 50-130°C<br>3D printing: 50-160°C | Multirap M420          | Oral drug delivery      | Tablets                                        | [17] |
| Eudragit EPO                                                                                                                                                                                                                  | Powder  | Hydrochlorothiazide<br><br>Enalapril maleate | 0%-50% (w/w) for hydrochlorothiazide<br>15% (w/w) for enalapril maleate | Stage 1: N/A<br><br>Stage 2: Drug and polymer were mixed using mortar and pestle.<br><br>Stage 3: A twin extruder was using to produce filament for 3D printing                                                                                                                          | HME: 100°C<br>3D printing: 135°C       | MAKERBOT REPLICATOR 2X | Oral drug delivery      | Tablets                                        | [18] |
| polylactic acid (2003D grade)                                                                                                                                                                                                 | Pellets | Progesterone                                 | 2%, 5% and 10% (w/w)<br><br>Drug loading efficiency was 70-90%          | Stage 1: Before the second extrusion, filament was cut into pieces and grinded.<br><br>Stage 2: In the first extrusion, drug and polymer pellets were physically mixed.<br><br>Stage 3: A single screw extruder was used in the two extrusion steps to produce filament for 3D printing. | HME: 160°C<br>3D printing: 200°C       | UP Mini 3D printer     | Veterinary applications | Projectile contains contraceptive progesterone | [19] |

|                                                                                            |        |                                         |                                                                |                                                                                                                                                                                                                                                                                                                                                                                                                                                                                                           |                                                     |                        |                    |         |      |
|--------------------------------------------------------------------------------------------|--------|-----------------------------------------|----------------------------------------------------------------|-----------------------------------------------------------------------------------------------------------------------------------------------------------------------------------------------------------------------------------------------------------------------------------------------------------------------------------------------------------------------------------------------------------------------------------------------------------------------------------------------------------|-----------------------------------------------------|------------------------|--------------------|---------|------|
| <p>PVA (Mowiol 4–88)</p> <p>Eudragit RL PO</p> <p>PLA (Resomer L 210 S)</p> <p>PEG 400</p> | Powder | <p>Metformin HCl</p> <p>Glimepiride</p> | <p>50% (w/w) for metformin</p> <p>2% (w/w) for glimepiride</p> | <p>Glimepiride-loaded PVA</p> <p>Stage 1: Polymer was sieved and grinded</p> <p>Stage 2: Drug and polymer were mixed using mortar and pestle.</p> <p>Stage 3: A twin extruder was used to produce filament for 3D printing.</p> <p>Metformin-loaded Eudragit:</p> <p>Stage 1: N/A</p> <p>Stage 2: Melt mixing during extrusion.</p> <p>Stage 3: A two-step extrusion process was used. First, using a single screw extruder and then using a twin screw extruder to produce filament for 3D printing.</p> | <p>HME: 160-190°C</p> <p>3D printing: 170-205°C</p> | MAKERBOT REPLICATOR 2X | Oral drug delivery | Tablets | [20] |
| <p>Kollidon VA64, 12PF</p> <p>PEG 1500</p>                                                 | Powder | Ramipril                                | <p>3% (w/w)</p> <p>Drug loading efficiency was around 100%</p> | <p>Stage 1: N/A</p> <p>Stage 2: Drug and polymer were mixed using mortar and pestle.</p> <p>Stage 3: A single screw extruder was used to produce filament for 3D printing.</p>                                                                                                                                                                                                                                                                                                                            | <p>HME: 70°C</p> <p>3D printing: 90°C</p>           | MAKERBOT REPLICATOR 2X | Oral drug delivery | Tablets | [21] |

|                                                                                                                                                                 |        |                                   |                                                                |                                                                                                                                                                                                         |                                       |                        |                    |         |      |
|-----------------------------------------------------------------------------------------------------------------------------------------------------------------|--------|-----------------------------------|----------------------------------------------------------------|---------------------------------------------------------------------------------------------------------------------------------------------------------------------------------------------------------|---------------------------------------|------------------------|--------------------|---------|------|
| Eudragit EPO                                                                                                                                                    | Powder | Warfarin                          | 1% (w/w)<br><br>Drug loading efficiency was around 90-100%     | Stage 1: N/A<br><br>Stage 2: Drug and polymer were melt-mixed in the extruder for 5 minutes before extrusion.<br><br>Stage 3: A twin screw extruder were used for producing a filament for 3D printing. | HME: 90-100°C<br>3D printing: 135°C   | MAKERBOT REPLICATOR 2X | Oral drug delivery | Tablets | [22] |
| Polyethylene glycol (Mw: 6000, 20000)<br><br>Poloxamer 407<br><br>Polyvinylpyrrolidone (k-value 12)<br><br>Kollidon VA64<br><br>Kollicoat IR<br><br>Kollidon CL | Powder | Pantoprazole sodium sesquihydrate | 5%-30% (w/w)<br><br>Drug loading efficiency was around 90-100% | Stage 1: N/A<br><br>Stage 2: Drug and polymer were mixed using mortar and pestle for 3 minutes.<br><br>Stage 3: The mixture was extruded using a self-constructed piston extruder                       | HME: 41-145°C<br>3D printing: 45-87°C | Multirap M420          | Oral drug delivery | Tablets | [23] |
| Gohsenol EG-05P<br><br>PLA                                                                                                                                      | Powder | Fluorescein                       | Not mentioned                                                  | Stage 1: N/A<br><br>Stage 2: N/A<br><br>Stage 3: A twin extruder was used to produce filament for 3D printing                                                                                           | HME: 90-210°C<br>3D printing: 190°C   | Ultimaker 3            | Oral drug delivery | Tablets | [24] |

|                                                                                                     |                 |                                                              |                                                               |                                                                                                                                                                                                    |                                          |                                   |                     |               |      |
|-----------------------------------------------------------------------------------------------------|-----------------|--------------------------------------------------------------|---------------------------------------------------------------|----------------------------------------------------------------------------------------------------------------------------------------------------------------------------------------------------|------------------------------------------|-----------------------------------|---------------------|---------------|------|
| <p>Polylactic acid (2002D)</p> <p>Polycaprolactone (Mw: 80,000)</p> <p>Polyethylene glycol 4000</p> | Powder, pellets | Progesterone                                                 | 5% (w/w)                                                      | <p>Stage 1: N/A</p> <p>Stage 2: Drug and polymer were melt-mixed and then cut into pieces for extrusion.</p> <p>Stage 3: A single screw extruder was used to produce filament for 3D printing.</p> | HME: 190°C<br>3D printing:195°C          | CF-12410B, Manli Technology Group | Intrauterine system | Vaginal rings | [25] |
| <p>Polyethylene glycol</p> <p>Hypromellose acetate succinate</p>                                    | Powder          | Indomethacin                                                 | 20% (w/w)<br>weight and content uniformity variation of 5–10% | <p>Stage 1: N/A</p> <p>Stage 2: Drug and polymer were mixed using a mixer for 10 minutes at 100 rpm.</p> <p>Stage 3: A twin extruder was used to produce filament for 3D printing.</p>             | HME: 40-140°C<br>3D printing:165°C       | Airwolf3D HD2xR                   | Oral drug delivery  | Tablets       | [26] |
| <p>Tecoflex™ (EG-72D, EG-80A)</p> <p>Tecophilic™ (SP-60D-60, SP-93A-100, TG-2000)</p>               | Powder, pellets | <p>Theophylline anhydrous</p> <p>Metformin hydrochloride</p> | 0%-60% (w/w)                                                  | <p>Stage 1: N/A.</p> <p>Stage 2: Drug and polymer were mixed.</p> <p>Stage 3: A twin extruder was used to produce filament for 3D printing.</p>                                                    | HME: 100-180°C<br>3D printing: 120-180°C | MAKERBOT REPLICATOR 2X            | Oral drug delivery  | Tablets       | [27] |

|                                                                |        |                        |                                                                        |                                                                                                                                                                                                                                 |                                     |                        |                    |         |      |
|----------------------------------------------------------------|--------|------------------------|------------------------------------------------------------------------|---------------------------------------------------------------------------------------------------------------------------------------------------------------------------------------------------------------------------------|-------------------------------------|------------------------|--------------------|---------|------|
| Eudragit E                                                     | Powder | Hydrochlorothiazide    | 12.5% (w/w)                                                            | <p>Stage 1: N/A</p> <p>Stage 2: Drug and polymer were melt-mixed using the extruder before extrusion for 5 minutes.</p> <p>Stage 3: A twin extruder was used to produce filament for 3D printing.</p>                           | HME: 90-100°C<br>3D printing: 135°C | MAKERBOT REPLICATOR 2X | Oral drug delivery | Tablets | [28] |
| Eudragit VR RL PO<br>Polyethylene glycol 4000                  | Powder | Anhydrous theophylline | <p>30% (w/w)</p> <p>Drug loading efficiency was around 97-99%</p>      | <p>Stage 1: Drug and polymer were sieved using a 355 µm mesh.</p> <p>Stage 2: Drug and polymer were mixed using a mixer for 20 minutes.</p> <p>Stage 3: A twin screw extruder was used to produce filament for 3D printing.</p> | HME: 30-175°C<br>3D printing: 180°C | Prodim XXL Pro         | Oral drug delivery | Tablets | [29] |
| Kollidon VA64<br>Kollicoat IR<br>Affinisol 15cP<br>Aqoat AS-MG | Powder | Haloperidol            | <p>10%, 20% (w/w)</p> <p>Drug loading efficiency was around 95-97%</p> | <p>Stage 1: N/A</p> <p>Stage 2: Drug and polymer were mixed using a mixer.</p> <p>Stage 3: A twin extruder was used to produce filament for 3D printing.</p>                                                                    | HME: 150°C<br>3D printing: 210°C    | MAKERBOT REPLICATOR 2X | Oral drug delivery | Tablets | [30] |

|                                                                                               |        |                                               |                            |                                                                                                                                                                                                       |                                         |                        |                    |                      |      |
|-----------------------------------------------------------------------------------------------|--------|-----------------------------------------------|----------------------------|-------------------------------------------------------------------------------------------------------------------------------------------------------------------------------------------------------|-----------------------------------------|------------------------|--------------------|----------------------|------|
| Benecel HPMC E5<br>Soluplus®                                                                  | Powder | Paracetamol                                   | 1% (w/w)                   | <p>Stage 1: N/A</p> <p>Stage 2: Drug and polymer were mixed in a mixer at 25 rpm for 30 minutes.</p> <p>Stage 3: A twin extruder was used to produce filament for 3D printing.</p>                    | HME: 160°C<br>3D printing: 200°C        | Ultimaker 3            | Oral drug delivery | Tablets              | [31] |
| Poval 4–88                                                                                    | Powder | Aripiprazole                                  | 0.55 (mg/cm <sup>2</sup> ) | <p>Stage 1: N/A</p> <p>Stage 2: Drug and polymer were mixed.</p> <p>Stage 3: A single screw extruder was used to produce filament for 3D printing</p>                                                 | HME: 172°C<br>3D printing: 190°C        | Zmorph 2.0S            | Oral drug delivery | Orodispersible films | [32] |
| Mowiol 4-88<br>Polylactic acid                                                                | Powder | Carvedilol<br>Hydrochlorothiazide<br>Mannitol | 6% (w/w)                   | <p>Stage 1: Polymer was sieved and grinded using 850 µm mesh.</p> <p>Stage 2: Drug and polymer were mixed.</p> <p>Stage 3: A single screw extruder were used to produce filament for 3D printing.</p> | HME: 170°C<br>3D printing: 200-220°C    | MAKERBOT REPLICATOR 2X | Oral drug delivery | Tablets              | [33] |
| Hydroxypropylmethylcellulose acetate succinate<br>HPMCAS LG<br>HPMCAS MG<br>HPMCAS HG (Aqoat) | Powder | Paracetamol                                   | 5%-50% (w/w)               | <p>Stage 1: N/A</p> <p>Stage 2: Drug and polymer were mixed using a mortar and pestle.</p> <p>Stage 3: A single screw extruder was used to produce filament for 3D printing.</p>                      | HME: 80-110°C<br>3D printing: 180-190°C | MAKERBOT REPLICATOR 2X | Oral drug delivery | Tablets              | [34] |

|                                                                                                                                              |          |             |                                                                 |                                                                                                                                                                                                                              |                                        |                        |                      |                           |      |
|----------------------------------------------------------------------------------------------------------------------------------------------|----------|-------------|-----------------------------------------------------------------|------------------------------------------------------------------------------------------------------------------------------------------------------------------------------------------------------------------------------|----------------------------------------|------------------------|----------------------|---------------------------|------|
| Polyvinyl alcohol (YiShengInc)                                                                                                               | Filament | Glipizide   | 2.5%, 5% (w/w)<br><br>Drug loading efficiency was around 88-96% | <p>Stage 1: Filament was grinded until become in powder form.</p> <p>Stage 2: Drug and polymer were mixed using mortar and pestle.</p> <p>Stage 3: A single screw extruder was used to produce filament for 3D printing.</p> | HME: 180°C<br>3D printing: 195°C       | Clouovo Delta-MK2      | Oral drug delivery   | Tablets                   | [35] |
| Hydroxypropyl cellulose (Klucel TM)                                                                                                          | Powder   | Domperidone | 1% (w/w)                                                        | <p>Stage 1: N/A</p> <p>Stage 2: Drug and polymer were mixed using mortar and pestle.</p> <p>Stage 3: A twin extruder was used to produce filament for 3D printing.</p>                                                       | HME: 145-150°C<br>3D printing: 210°C   | MakerBot Replicator 2X | Oral drug delivery   | Tablets                   | [36] |
| Eudragit RS<br><br>Poly(L-lactide) (Resomer L206S)<br><br>Polycaprolactone (Mw: 14,000)<br><br>Ethyl cellulose (ETHOCEL Standard 45 Premium) | Powder   | Quinine     | 5% (w/w)                                                        | <p>Stage 1: N/A</p> <p>Stage 2: Drug and Polymer was mixed using solvent casting.</p> <p>Stage 3: A single screw extruder was used to produce filament for 3D printing.</p>                                                  | HME: 47-140°C<br>3D printing: 53-164°C | Multirap M420          | Drug delivery system | Implant (hollow cylinder) | [37] |
| Benecel HPMC E5<br><br>Klucel HPC EF, LF<br><br>Aqualon EC N14<br><br>Soluplus<br><br>Eudragit1 L100                                         | Powder   | Paracetamol | 30% (w/w)                                                       | <p>Stage 1: N/A</p> <p>Stage 2: Drug and polymer were mixed in a mixer for 20 minutes at 25 rpm.</p> <p>Stage 3: A twin screw extruder was used to produce filament for 3D printing.</p>                                     | HME: 140-160°C<br>3D printing: 200°C   | Prusa i3               | Oral drug delivery   | Tablets                   | [38] |

|                                                |          |                                                                                         |                                                                                                                             |                                                                                                                                                                                                                                               |                                              |                        |                                |                |      |
|------------------------------------------------|----------|-----------------------------------------------------------------------------------------|-----------------------------------------------------------------------------------------------------------------------------|-----------------------------------------------------------------------------------------------------------------------------------------------------------------------------------------------------------------------------------------------|----------------------------------------------|------------------------|--------------------------------|----------------|------|
| PVA (Nippon Syntheti)                          | Filament | Curcumin                                                                                | 1.75 (mg/g) in the filament                                                                                                 | <p>Stage 1: N/A</p> <p>Stage 2: A saturated solution was prepared.</p> <p>Stage 3: The filament was soaked in the solution over night at room temperature.</p>                                                                                | 3D printing: 150-250°C                       | Ninjabot FDM-200W      | Oral drug delivery             | Tablets        | [39] |
| Oleo-gum-resins from benzoin, myrrha, olibanum | Powder   | Metal oxide nanoparticles (TiO <sub>2</sub> , Cu <sub>2</sub> O, and MoO <sub>3</sub> ) | 10% (w/w)                                                                                                                   | <p>Stage 1: N/A</p> <p>Stage 2: Drug and polymer were mixed.</p> <p>Stage 3: A single screw extruder was used to produce filament for 3D printing.</p>                                                                                        | <p>HME: 70-85°C</p> <p>3D printing: 80°C</p> | Prusa i3               | Bacterial infection prevention | Implant, disks | [40] |
| PVA (Makerbot Inc)                             | Filament | Paracetamol<br>Caffeine                                                                 | <p>5%, 10% (w/w)</p> <p>Drug loading efficiency was around 82-86% and 94-95% for paracetamol and caffeine, respectively</p> | <p>Stage 1: Filament was cut into small pieces and grinded.</p> <p>Stage 2: Drug and polymer were mixed using mortar and pestle and a shaker-mixer.</p> <p>Stage 3: A single screw extruder was used to produce filament for 3D printing.</p> | <p>HME: 180°C</p> <p>3D printing: 200°C</p>  | MAKERBOT REPLICATOR 2X | Oral drug delivery             | Tablets        | [41] |

|                                                                                                   |        |                                                    |                                                              |                                                                                                                                                                                                |                                      |                        |                    |         |      |
|---------------------------------------------------------------------------------------------------|--------|----------------------------------------------------|--------------------------------------------------------------|------------------------------------------------------------------------------------------------------------------------------------------------------------------------------------------------|--------------------------------------|------------------------|--------------------|---------|------|
| Eudragit EPO                                                                                      | Powder | Theophylline<br>5-ASA<br>Captopril<br>Prednisolone | 12.5% (w/w)<br><br>Drug loading efficiency was around 88-96% | Stage 1: N/A<br><br>Stage 2: Drug and polymer were melt-mixed using the extruder before extrusion for 5 minutes.<br><br>Stage 3: A twin extruder was used to produce filament for 3D printing. | HME: 90-100°C<br>3D printing: 135°C  | MAKERBOT REPLICATOR 2X | Oral drug delivery | Tablets | [42] |
| Polyethylene glycol (Mw: 4000)<br><br>Polyethylene Oxide (POLYOX WSR N10 LEO)<br><br>Eudragit EPO | Powder | Felodipine                                         | 10% (w/w)                                                    | Stage 1: N/A<br><br>Stage 2: Drug and polymer were mixed using mortar and pestle for 2 minutes.<br><br>Stage 3: A twin screw extruder was used to produce filament for 3D printing.            | HME: 100-130°C<br>3D printing: 150°C | MAKERBOT REPLICATOR 2X | Oral drug delivery | Tablets | [43] |
| Polyvinylpyrrolidone (Mw: 40,000)                                                                 | Powder | Theophylline<br>Dipyridamole                       | 10% (w/w)<br><br>Drug loading efficiency was around 100%     | Stage 1: N/A<br><br>Stage 2: Drug and polymer were melt-mixed using the extruder before extrusion for 5 minutes.<br><br>Stage 3: A twin extruder was used to produce filament for 3D printing. | HME: 90-100°C<br>3D printing: 110°C  | MAKERBOT REPLICATOR 2X | Oral drug delivery | Tablets | [44] |

|                                                                                                                        |          |                |                                                              |                                                                                                                                                                                                        |                                          |                        |                                          |                             |      |
|------------------------------------------------------------------------------------------------------------------------|----------|----------------|--------------------------------------------------------------|--------------------------------------------------------------------------------------------------------------------------------------------------------------------------------------------------------|------------------------------------------|------------------------|------------------------------------------|-----------------------------|------|
| PCL (CAPA 6500)                                                                                                        | Filament | Indomethacin   | 5%, 15%, 30% (w/w)<br><br>Drug loading efficiency was 73-90% | <p>Stage 1: N/A</p> <p>Stage 2: Drug and polymer were melt-mixed using the extruder before extrusion for 10 minutes.</p> <p>Stage 3: A twin extruder was used to produce filament for 3D printing.</p> | HME: 100°C<br>3D printing: 100°C         | MakerBot Replicator 2X | Intrauterine system                      | T-shaped                    | [45] |
| <p>EVA copolymer (ATEVA 1070, 1075A, 1081G, 1241, 1641, 1821A, 1850A, 1880A, 2821A, 3325A)</p> <p>PCL (CAPA™ 6500)</p> | Filament | Indomethacin   | 5%, 15% (w/w)                                                | <p>Stage 1: N/A</p> <p>Stage 2: Drug and polymer were melt-mixed using the extruder before extrusion for 10 minutes.</p> <p>Stage 3: A twin extruder was used to produce filament for 3D printing.</p> | HME: 105-120°C<br>3D printing: 100-215°C | MakerBot Replicator 2X | Intrauterine system                      | T-shaped, subcutaneous rods | [46] |
| <p>Flex EcoPLA BLUE 45D</p> <p>Polycaprolactone (Mw: 80,000)</p>                                                       | Filament | Salicylic acid | 2% (w/w)<br><br>Drug loading efficiency was around 67%       | <p>Stage 1: N/A</p> <p>Stage 2: Drug and Polymer was mixed using solvent casting.</p> <p>Stage 3: A single screw extruder was used to produce filament for 3D printing.</p>                            | HME: 60-190°C<br>3D printing: 170-230°C  | MakerBot Replicator 2X | Nose shape, anti-acne drug loaded device | Implant                     | [47] |

|                                                        |          |              |                                                            |                                                                                                                                                                                                                                               |                                          |                        |                    |                                           |      |
|--------------------------------------------------------|----------|--------------|------------------------------------------------------------|-----------------------------------------------------------------------------------------------------------------------------------------------------------------------------------------------------------------------------------------------|------------------------------------------|------------------------|--------------------|-------------------------------------------|------|
| Polyvinyl alcohol                                      | Filament | Budesonide   | 2%, 5% (w/w)<br><br>Drug loading efficiency was around 82% | <p>Stage 1: Filament was cut into small pieces and grinded.</p> <p>Stage 2: Drug and polymer were mixed using mortar and pestle and a shaker-mixer.</p> <p>Stage 3: A single screw extruder was used to produce filament for 3D printing.</p> | HME: 170°C<br>3D printing: 190°C         | MakerBot Replicator 2X | Oral drug delivery | Tablets                                   | [48] |
| Polyvinyl alcohol                                      | Filament | Paracetamol  | 5% (w/w)<br><br>Drug loading efficiency was around 79%     | <p>Stage 1: Filament was cut into small pieces and grinded.</p> <p>Stage 2: Drug and polymer were mixed using mortar and pestle and a shaker-mixer.</p> <p>Stage 3: A single screw extruder was used to produce filament for 3D printing.</p> | HME: 180°C<br>3D printing: 180°C         | MakerBot Replicator 2X | Oral drug delivery | Cube, pyramid, cylinder, sphere and torus | [49] |
| Eudragit RL100, RS100<br>Hydroxypropyl cellulose (SSL) | Powder   | Theophylline | 50% (w/w)<br><br>Drug loading efficiency was around 91-95% | <p>Stage 1: N/A</p> <p>Stage 2: Drug and polymer were melt-mixed using the extruder before extrusion for 5 minutes.</p> <p>Stage 3: A twin extruder was used to produce filament for 3D printing.</p>                                         | HME: 110-130°C<br>3D printing: 140-170°C | MakerBot Replicator 2X | Oral drug delivery | Tablets                                   | [50] |

|                   |          |                                                           |                                                             |                                                                                                                                                                          |                    |                                |                                |                                                         |      |
|-------------------|----------|-----------------------------------------------------------|-------------------------------------------------------------|--------------------------------------------------------------------------------------------------------------------------------------------------------------------------|--------------------|--------------------------------|--------------------------------|---------------------------------------------------------|------|
| Polyvinyl alcohol | Filament | Prednisolone                                              | 1.9% (w/w)                                                  | <p>Stage 1: N/A</p> <p>Stage 2: A saturated solution was prepared.</p> <p>Stage 3: The filament was soaked in the solution for 24 hours at 30 C.</p>                     | 3D printing: 230°C | MakerBot Replicator 2X         | Oral drug delivery             | Tablets                                                 | [51] |
| polyvinyl alcohol | Filament | <p>5-aminosalicylic acid</p> <p>4-aminosalicylic acid</p> | 0.06% and 0.25% (w/w) for the 5-ASA and 4-ASA, respectively | <p>Stage 1: N/A</p> <p>Stage 2: A dispersion of drug in a solvent was prepared.</p> <p>Stage 3: The filament was soaked in the solution for 24 hours under stirring.</p> | 3D printing: 210°C | MakerBot Replicator 2X         | Oral drug delivery             | Tablets                                                 | [52] |
| polyvinyl alcohol | Filament | Fluorescein                                               | 0.29% (w/w)                                                 | <p>Stage 1: N/A</p> <p>Stage 2: A solution of drug in a solvent was prepared.</p> <p>Stage 3: The filament was soaked in the solution for 24 hours under stirring.</p>   | 3D printing: 220°C | MakerBot Replicator 2X         | Oral drug delivery             | Tablets                                                 | [53] |
| PCL (Mw: 80,000)  | Pellets  | Gentamicin sulphate                                       | 5%, 15%, 25% (w/w)                                          | <p>Stage 1: N/A</p> <p>Stage 2: Materials were melt-mixed.</p> <p>Stage 3: A piston extruder was used to produce filament for 3D printing.</p>                           | 3D printing: 100°C | Stratasys 3D Modeler RP system | Bacterial infection prevention | Implant, 3-dimensional mesh with honeycomb-like pattern | [54] |

|                                                                                 |        |                                                                |                                                                              |                                                                                                                                                                                                                                           |                                                     |                        |                    |                                 |      |
|---------------------------------------------------------------------------------|--------|----------------------------------------------------------------|------------------------------------------------------------------------------|-------------------------------------------------------------------------------------------------------------------------------------------------------------------------------------------------------------------------------------------|-----------------------------------------------------|------------------------|--------------------|---------------------------------|------|
| <p>PVA (PVA05, PVA18, Gohsenol EG 05P, EG 18P)</p> <p>Eudragit RL100, RS100</p> | Powder | Allopurinol                                                    | <p>1% (w/w)</p> <p>Drug loading efficiency was around 98-99%</p>             | <p>Stage 1: materials were milled and sieved using 250 µm mesh after mixing.</p> <p>Stage 2: Drug and polymer were mixed using mortar and pestle.</p> <p>Stage 3: A twin screw extruder was used to produce filament for 3D printing.</p> | <p>HME: 175-200°C</p> <p>3D printing: 200°C</p>     | KLONER3D 240TWIN       | Oral drug delivery | Structure with different shapes | [55] |
| <p>Ethyl cellulose</p> <p>Hydroxypropyl methylcellulose (K100-LV Premium)</p>   | Powder | Ibuprofen                                                      | <p>16-20% (w/w)</p>                                                          | <p>Stage 1: N/A</p> <p>Stage 2: Drug and polymer were mixed.</p> <p>Stage 3: A twin extruder was used to produce filament for 3D printing.</p>                                                                                            | <p>HME: 100-120°C</p> <p>3D printing: 170-186°C</p> | A3 JGAURORA            | Oral drug delivery | Structure with different shapes | [56] |
| <p>Polyvinylpyrrolidone (Mw: 40,000)</p> <p>PEG400</p>                          | Powder | <p>Theophylline</p> <p>Budesonide</p> <p>Diclofenac sodium</p> | <p>10%, 2.3%, 20% (w/w)</p> <p>Drug loading efficiency was around 85-99%</p> | <p>Stage 1: N/A</p> <p>Stage 2: Drug and polymer were melt-mixed using the extruder before extrusion for 5 minutes.</p> <p>Stage 3: A twin extruder was used to produce filament for 3D printing.</p>                                     | <p>HME: 100-135°C</p> <p>3D printing: 110-185°C</p> | MAKERBOT REPLICATOR 2X | Oral drug delivery | Tablets                         | [57] |

|                                                                       |        |                                                                                                      |                                                                                                                                                                                                |                                                                                                                                                                                                                                                                                          |                                                     |                        |                    |                   |      |
|-----------------------------------------------------------------------|--------|------------------------------------------------------------------------------------------------------|------------------------------------------------------------------------------------------------------------------------------------------------------------------------------------------------|------------------------------------------------------------------------------------------------------------------------------------------------------------------------------------------------------------------------------------------------------------------------------------------|-----------------------------------------------------|------------------------|--------------------|-------------------|------|
| <p>Poloxamine 908 (Tetronic)</p> <p>Polycaprolactone (Mw: 50,000)</p> | Powder | Dexamethasone                                                                                        | 0.001%, 0.1% (w/w)                                                                                                                                                                             | <p>Stage 1: Polymer were grinded before use.</p> <p>Stage 2: Polymers were mixed in a turbula for 15 minutes. Drug and the mixer were melt-mixed</p> <p>Stage 3: The mixture was poured in a tube with a diameter of a filament and placed into an ice bath to solidify the mixture.</p> | <p>HME: 80°C</p> <p>3D printing: 110°C</p>          | Printrbot Simple       | Bone regeneration  | Implant, Scaffold | [58] |
| <p>Mowiol 4-88</p> <p>Chitosan</p>                                    | Powder | Diclofenac sodium                                                                                    | <p>8% (w/w)</p> <p>Drug loading efficiency was around 60-100%</p>                                                                                                                              | <p>Stage 1: N/A</p> <p>Stage 2: Drug and polymer were mixed.</p> <p>Stage 3: A single screw extruder was used to produce filament for 3D printing.</p>                                                                                                                                   | <p>HME: 165-169°C</p> <p>3D printing: 190-200°C</p> | Makerbot Replicator 2X | Oral drug delivery | Films             | [59] |
| <p>Sorbitol</p> <p>Parteck MXP</p>                                    | Powder | <p>Lisinopril dihydrate</p> <p>Indapamide</p> <p>Amlodipine besylate</p> <p>Rosuvastatin calcium</p> | <p>5%-20%, 10%-2.5%, 5%-1.25% and 20%-5% for Lisinopril dihydrate, Indapamide, Amlodipine besylate and Rosuvastatin calcium, respectively</p> <p>Drug loading efficiency was around 93-99%</p> | <p>Stage 1: N/A</p> <p>Stage 2: Drug and polymer were mixed for 5 minutes at 100 rpm.</p> <p>Stage 3: A twin extruder was used to produce filament for 3D printing.</p>                                                                                                                  | <p>HME: 100°C</p> <p>3D printing: 210°C</p>         | Makerbot Replicator 2X | Oral drug delivery | Tablets           | [60] |

## References

1. Fuenmayor, E.; O'Donnell, C.; Gately, N.; Doran, P.; Devine, D.M.; Lyons, J.G.; McConville, C.; Major, I. Mass-customization of oral tablets via the combination of 3D printing and injection molding. *International Journal of Pharmaceutics* **2019**, *569*, 118611, doi:10.1016/j.ijpharm.2019.118611.
2. Tagami, T.; Kuwata, E.; Sakai, N.; Ozeki, T. Drug Incorporation into Polymer Filament Using Simple Soaking Method for Tablet Preparation Using Fused Deposition Modeling. *Biological and Pharmaceutical Bulletin* **2019**, *42*, 1753–1760, doi:10.1248/bpb.b19-00482.
3. Qamar, N.; Abbas, N.; Irfan, M.; Hussain, A.; Arshad, M.S.; Latif, S.; Mehmood, F.; Ghor, M.U. Personalized 3D printed ciprofloxacin impregnated meshes for the management of hernia. *Journal of Drug Delivery Science and Technology* **2019**, *53*, 101164, doi:10.1016/j.jddst.2019.101164.
4. Jiang, H.; Fu, J.; Li, M.; Wang, S.; Zhuang, B.; Sun, H.; Ge, C.; Feng, B.; Jin, Y. 3D-Printed Wearable Personalized Orthodontic Retainers for Sustained Release of Clonidine Hydrochloride. *AAPS PharmSciTech* **2019**, *20*, 260, doi:10.1208/s12249-019-1460-6.
5. Kimura, S.; Ishikawa, T.; Iwao, Y.; Itai, S.; Kondo, H. Fabrication of Zero-Order Sustained-Release Floating Tablets via Fused Depositing Modeling 3D Printer. *Chemical and Pharmaceutical Bulletin* **2019**, *67*, 992–999, doi:10.1248/cpb.c19-00290.
6. Gültekin, H.E.; Tort, S.; Acartürk, F. An Effective Technology for the Development of Immediate Release Solid Dosage Forms Containing Low-Dose Drug: Fused Deposition Modeling 3D Printing. *Pharm Res* **2019**, *36*, 128, doi:10.1007/s11095-019-2655-y.
7. Farto-Vaamonde, X.; Auriemma, G.; Aquino, R.P.; Concheiro, A.; Alvarez-Lorenzo, C. Post-manufacture loading of filaments and 3D printed PLA scaffolds with prednisolone and dexamethasone for tissue regeneration applications. *European Journal of Pharmaceutics and Biopharmaceutics* **2019**, *141*, 100–110, doi:10.1016/j.ejpb.2019.05.018.
8. Ibrahim, M.; Barnes, M.; McMillin, R.; Cook, D.W.; Smith, S.; Halquist, M.; Wijesinghe, D.; Roper, T.D. 3D Printing of Metformin HCl PVA Tablets by Fused Deposition Modeling: Drug Loading, Tablet Design, and Dissolution Studies. *AAPS PharmSciTech* **2019**, *20*, 195, doi:10.1208/s12249-019-1400-5.
9. Isreb, A.; Baj, K.; Wojsz, M.; Isreb, M.; Peak, M.; Alhnan, M.A. 3D printed oral theophylline doses with innovative 'radiator-like' design: Impact of polyethylene oxide (PEO) molecular weight. *International Journal of Pharmaceutics* **2019**, *564*, 98–105, doi:10.1016/j.ijpharm.2019.04.017.
10. Saviano, M.; Aquino, R.P.; Del Gaudio, P.; Sansone, F.; Russo, P. Poly(vinyl alcohol) 3D printed tablets: The effect of polymer particle size on drug loading and process efficiency. *International Journal of Pharmaceutics* **2019**, *561*, 1–8, doi:10.1016/j.ijpharm.2019.02.025.
11. Tidau, M.; Kwade, A.; Finke, J.H. Influence of High, Disperse API Load on Properties along the Fused-Layer Modeling Process Chain of Solid Dosage Forms. *Pharmaceutics* **2019**, *11*, 194, doi:10.3390/pharmaceutics11040194.
12. Fuenmayor, E.; Forde, M.; Healy, A.V.; Devine, D.M.; Lyons, J.G.; McConville, C.; Major, I. Comparison of fused-filament fabrication to direct compression and injection molding in the manufacture of oral tablets. *International Journal of Pharmaceutics* **2019**, *558*, 328–340, doi:10.1016/j.ijpharm.2019.01.013.
13. Ilyés, K.; Kovács, N.K.; Balogh, A.; Borbás, E.; Farkas, B.; Casian, T.; Marosi, G.; Tomuță, I.; Nagy, Z.K. The applicability of pharmaceutical polymeric blends for the fused deposition modelling (FDM) 3D technique: Material considerations—printability—process modulation, with consecutive effects on in vitro release, stability and degradation. *European Journal of Pharmaceutical Sciences* **2019**, *129*, 110–123, doi:10.1016/j.ejps.2018.12.019.
14. Palekar, S.; Nukala, P.K.; Mishra, S.M.; Kipping, T.; Patel, K. Application of 3D printing technology and quality by design approach for development of age-appropriate pediatric formulation of baclofen. *International Journal of Pharmaceutics* **2019**, *556*, 106–116, doi:10.1016/j.ijpharm.2018.11.062.
15. Nukala, P.K.; Palekar, S.; Patki, M.; Patel, K. Abuse Deterrent Immediate Release Egg-Shaped Tablet (Egglets) Using 3D Printing Technology: Quality by Design to Optimize Drug Release and Extraction. *AAPS PharmSciTech* **2019**, *20*, 80, doi:10.1208/s12249-019-1298-y.
16. Öblom, H.; Zhang, J.; Pimparade, M.; Speer, I.; Preis, M.; Repka, M.; Sandler, N. 3D-Printed Isoniazid Tablets for the Treatment and Prevention of Tuberculosis—Personalized Dosing and Drug Release. *AAPS PharmSciTech* **2019**, *20*, 52, doi:10.1208/s12249-018-1233-7.
17. Kempin, W.; Domsta, V.; Brecht, I.; Semmling, B.; Tillmann, S.; Weitschies, W.; Seidlitz, A. Development of a dual extrusion printing technique for an acid- and thermo-labile drug. *European Journal of Pharmaceutical Sciences* **2018**, *123*, 191–198, doi:10.1016/j.ejps.2018.07.041.

18. Sadia, M.; Isreb, A.; Abbadi, I.; Isreb, M.; Aziz, D.; Selo, A.; Timmins, P.; Alhnan, M.A. From 'fixed dose combinations' to 'a dynamic dose combiner': 3D printed bi-layer antihypertensive tablets. *European Journal of Pharmaceutical Sciences* **2018**, *123*, 484–494, doi:10.1016/j.ejps.2018.07.045.
19. Long, J.; Nand, A.V.; Ray, S.; Mayhew, S.; White, D.; Bunt, C.R.; Seyfoddin, A. Development of customised 3D printed biodegradable projectile for administering extended-release contraceptive to wildlife. *International Journal of Pharmaceutics* **2018**, *548*, 349–356, doi:10.1016/j.ijpharm.2018.07.002.
20. Gioumouxouzis, C.I.; Baklavaridis, A.; Katsamenis, O.L.; Markopoulou, C.K.; Bouropoulos, N.; Tzetzis, D.; Fatouros, D.G. A 3D printed bilayer oral solid dosage form combining metformin for prolonged and glimepiride for immediate drug delivery. *European Journal of Pharmaceutical Sciences* **2018**, *120*, 40–52, doi:10.1016/j.ejps.2018.04.020.
21. Kollamaram, G.; Croker, D.M.; Walker, G.M.; Goyanes, A.; Basit, A.W.; Gaisford, S. Low temperature fused deposition modeling (FDM) 3D printing of thermolabile drugs. *International Journal of Pharmaceutics* **2018**, *545*, 144–152, doi:10.1016/j.ijpharm.2018.04.055.
22. Arafat, B.; Qinna, N.; Cieszyńska, M.; Forbes, R.T.; Alhnan, M.A. Tailored on demand anti-coagulant dosing: An in vitro and in vivo evaluation of 3D printed purpose-designed oral dosage forms. *European Journal of Pharmaceutics and Biopharmaceutics* **2018**, *128*, 282–289, doi:10.1016/j.ejpb.2018.04.010.
23. Kempin, W.; Domsta, V.; Grathoff, G.; Brecht, I.; Semmling, B.; Tillmann, S.; Weitschies, W.; Seidlitz, A. Immediate Release 3D-Printed Tablets Produced Via Fused Deposition Modeling of a Thermo-Sensitive Drug. *Pharm Res* **2018**, *35*, 124, doi:10.1007/s11095-018-2405-6.
24. Tagami, T.; Nagata, N.; Hayashi, N.; Ogawa, E.; Fukushima, K.; Sakai, N.; Ozeki, T. Defined drug release from 3D-printed composite tablets consisting of drug-loaded polyvinylalcohol and a water-soluble or water-insoluble polymer filler. *International Journal of Pharmaceutics* **2018**, *543*, 361–367, doi:10.1016/j.ijpharm.2018.03.057.
25. Fu, J.; Yu, X.; Jin, Y. 3D printing of vaginal rings with personalized shapes for controlled release of progesterone. *International Journal of Pharmaceutics* **2018**, *539*, 75–82, doi:10.1016/j.ijpharm.2018.01.036.
26. Scutaris, N.; Ross, S.A.; Douroumis, D. 3D Printed "Starmix" Drug Loaded Dosage Forms for Paediatric Applications. *Pharm Res* **2018**, *35*, 34, doi:10.1007/s11095-017-2284-2.
27. Verstraete, G.; Samaro, A.; Grymonpré, W.; Vanhoorne, V.; Van Snick, B.; Boone, M.N.; Hellemans, T.; Van Hoorebeke, L.; Remon, J.P.; Vervaet, C. 3D printing of high drug loaded dosage forms using thermoplastic polyurethanes. *International Journal of Pharmaceutics* **2018**, *536*, 318–325, doi:10.1016/j.ijpharm.2017.12.002.
28. Sadia, M.; Arafat, B.; Ahmed, W.; Forbes, R.T.; Alhnan, M.A. Channelled tablets: An innovative approach to accelerating drug release from 3D printed tablets. *Journal of Controlled Release* **2018**, *269*, 355–363, doi:10.1016/j.jconrel.2017.11.022.
29. Korte, C.; Quodbach, J. Formulation development and process analysis of drug-loaded filaments manufactured via hot-melt extrusion for 3D-printing of medicines. *Pharmaceutical Development and Technology* **2018**, *23*, 1117–1127, doi:10.1080/10837450.2018.1433208.
30. Solanki, N.G.; Tahsin, M.; Shah, A.V.; Serajuddin, A.T.M. Formulation of 3D Printed Tablet for Rapid Drug Release by Fused Deposition Modeling: Screening Polymers for Drug Release, Drug-Polymer Miscibility and Printability. *J Pharm Sci* **2018**, *107*, 390–401, doi:10.1016/j.xphs.2017.10.021.
31. Zhang, J.; Yang, W.; Vo, A.Q.; Feng, X.; Ye, X.; Kim, D.W.; Repka, M.A. Hydroxypropyl methylcellulose-based controlled release dosage by melt extrusion and 3D printing: Structure and drug release correlation. *Carbohydrate Polymers* **2017**, *177*, 49–57, doi:10.1016/j.carbpol.2017.08.058.
32. Jamróz, W.; Kurek, M.; Łyszczarz, E.; Szafraniec, J.; Knapik-Kowalczyk, J.; Syrek, K.; Paluch, M.; Jachowicz, R. 3D printed orodispersible films with Aripiprazole. *International Journal of Pharmaceutics* **2017**, *533*, 413–420, doi:10.1016/j.ijpharm.2017.05.052.
33. Gioumouxouzis, C.I.; Katsamenis, O.L.; Bouropoulos, N.; Fatouros, D.G. 3D printed oral solid dosage forms containing hydrochlorothiazide for controlled drug delivery. *Journal of Drug Delivery Science and Technology* **2017**, *40*, 164–171, doi:10.1016/j.jddst.2017.06.008.
34. Goyanes, A.; Fina, F.; Martorana, A.; Sedough, D.; Gaisford, S.; Basit, A.W. Development of modified release 3D printed tablets (printlets) with pharmaceutical excipients using additive manufacturing. *International Journal of Pharmaceutics* **2017**, *527*, 21–30, doi:10.1016/j.ijpharm.2017.05.021.
35. Li, Q.; Wen, H.; Jia, D.; Guan, X.; Pan, H.; Yang, Y.; Yu, S.; Zhu, Z.; Xiang, R.; Pan, W. Preparation and investigation of controlled-release glipizide novel oral device with three-dimensional printing. *International Journal of Pharmaceutics* **2017**, *525*, 5–11, doi:10.1016/j.ijpharm.2017.03.066.

36. Chai, X.; Chai, H.; Wang, X.; Yang, J.; Li, J.; Zhao, Y.; Cai, W.; Tao, T.; Xiang, X. Fused Deposition Modeling (FDM) 3D Printed Tablets for Intragastric Floating Delivery of Domperidone. *Sci Rep* **2017**, *7*, 1–9, doi:10.1038/s41598-017-03097-x.
37. Kempin, W.; Franz, C.; Koster, L.-C.; Schneider, F.; Bogdahn, M.; Weitschies, W.; Seidlitz, A. Assessment of different polymers and drug loads for fused deposition modeling of drug loaded implants. *European Journal of Pharmaceutics and Biopharmaceutics* **2017**, *115*, 84–93, doi:10.1016/j.ejpb.2017.02.014.
38. Zhang, J.; Feng, X.; Patil, H.; Tiwari, R.V.; Repka, M.A. Coupling 3D printing with hot-melt extrusion to produce controlled-release tablets. *International Journal of Pharmaceutics* **2017**, *519*, 186–197, doi:10.1016/j.ijpharm.2016.12.049.
39. Tagami, T.; Fukushige, K.; Ogawa, E.; Hayashi, N.; Ozeki, T. 3D Printing Factors Important for the Fabrication of Polyvinylalcohol Filament-Based Tablets. *Biological and Pharmaceutical Bulletin* **2017**, *40*, 357–364, doi:10.1248/bpb.b16-00878.
40. Horst, D.J.; Tebcherani, S.M.; Kubaski, E.T.; de Almeida Vieira, R. Bioactive Potential of 3D-Printed Oleo-Gum-Resin Disks: B. papyrifera, C. myrrha, and S. benzoin Loading Nanooxides—TiO<sub>2</sub>, P<sub>25</sub>, Cu<sub>2</sub>O, and MoO<sub>3</sub> Available online: <https://www.hindawi.com/journals/bca/2017/6398167/> (accessed on Nov 11, 2019).
41. Goyanes, A.; Kobayashi, M.; Martínez-Pacheco, R.; Gaisford, S.; Basit, A.W. Fused-filament 3D printing of drug products: Microstructure analysis and drug release characteristics of PVA-based caplets. *International Journal of Pharmaceutics* **2016**, *514*, 290–295, doi:10.1016/j.ijpharm.2016.06.021.
42. Sadia, M.; Sośnicka, A.; Arafat, B.; Isreb, A.; Ahmed, W.; Kelarakis, A.; Alhnan, M.A. Adaptation of pharmaceutical excipients to FDM 3D printing for the fabrication of patient-tailored immediate release tablets. *International Journal of Pharmaceutics* **2016**, *513*, 659–668, doi:10.1016/j.ijpharm.2016.09.050.
43. Alhijaj, M.; Belton, P.; Qi, S. An investigation into the use of polymer blends to improve the printability of and regulate drug release from pharmaceutical solid dispersions prepared via fused deposition modeling (FDM) 3D printing. *European Journal of Pharmaceutics and Biopharmaceutics* **2016**, *108*, 111–125, doi:10.1016/j.ejpb.2016.08.016.
44. Okwuosa, T.C.; Stefaniak, D.; Arafat, B.; Isreb, A.; Wan, K.-W.; Alhnan, M.A. A Lower Temperature FDM 3D Printing for the Manufacture of Patient-Specific Immediate Release Tablets. *Pharm Res* **2016**, *33*, 2704–2712, doi:10.1007/s11095-016-1995-0.
45. Holländer, J.; Genina, N.; Jukarainen, H.; Khajeheian, M.; Rosling, A.; Mäkilä, E.; Sandler, N. Three-Dimensional Printed PCL-Based Implantable Prototypes of Medical Devices for Controlled Drug Delivery. *Journal of Pharmaceutical Sciences* **2016**, *105*, 2665–2676, doi:10.1016/j.xphs.2015.12.012.
46. Genina, N.; Holländer, J.; Jukarainen, H.; Mäkilä, E.; Salonen, J.; Sandler, N. Ethylene vinyl acetate (EVA) as a new drug carrier for 3D printed medical drug delivery devices. *European Journal of Pharmaceutical Sciences* **2016**, *90*, 53–63, doi:10.1016/j.ejps.2015.11.005.
47. Goyanes, A.; Det-Amornrat, U.; Wang, J.; Basit, A.W.; Gaisford, S. 3D scanning and 3D printing as innovative technologies for fabricating personalized topical drug delivery systems. *Journal of Controlled Release* **2016**, *234*, 41–48, doi:10.1016/j.jconrel.2016.05.034.
48. Goyanes, A.; Chang, H.; Sedough, D.; Hatton, G.B.; Wang, J.; Buanz, A.; Gaisford, S.; Basit, A.W. Fabrication of controlled-release budesonide tablets via desktop (FDM) 3D printing. *International Journal of Pharmaceutics* **2015**, *496*, 414–420, doi:10.1016/j.ijpharm.2015.10.039.
49. Goyanes, A.; Robles Martinez, P.; Buanz, A.; Basit, A.W.; Gaisford, S. Effect of geometry on drug release from 3D printed tablets. *International Journal of Pharmaceutics* **2015**, *494*, 657–663, doi:10.1016/j.ijpharm.2015.04.069.
50. Pietrzak, K.; Isreb, A.; Alhnan, M.A. A flexible-dose dispenser for immediate and extended release 3D printed tablets. *European Journal of Pharmaceutics and Biopharmaceutics* **2015**, *96*, 380–387, doi:10.1016/j.ejpb.2015.07.027.
51. Skowyra, J.; Pietrzak, K.; Alhnan, M.A. Fabrication of extended-release patient-tailored prednisolone tablets via fused deposition modelling (FDM) 3D printing. *European Journal of Pharmaceutical Sciences* **2015**, *68*, 11–17, doi:10.1016/j.ejps.2014.11.009.
52. Goyanes, A.; Buanz, A.B.M.; Hatton, G.B.; Gaisford, S.; Basit, A.W. 3D printing of modified-release aminosalicylate (4-ASA and 5-ASA) tablets. *European Journal of Pharmaceutics and Biopharmaceutics* **2015**, *89*, 157–162, doi:10.1016/j.ejpb.2014.12.003.
53. Goyanes, A.; Buanz, A.B.M.; Basit, A.W.; Gaisford, S. Fused-filament 3D printing (3DP) for fabrication of tablets. *International Journal of Pharmaceutics* **2014**, *476*, 88–92, doi:10.1016/j.ijpharm.2014.09.044.

54. Teo, E.Y.; Ong, S.-Y.; Khoon Chong, M.S.; Zhang, Z.; Lu, J.; Moochhala, S.; Ho, B.; Teoh, S.-H. Polycaprolactone-based fused deposition modeled mesh for delivery of antibacterial agents to infected wounds. *Biomaterials* **2011**, *32*, 279–287, doi:10.1016/j.biomaterials.2010.08.089.
55. Melocchi, A.; Uboldi, M.; Inverardi, N.; Briatico-Vangosa, F.; Baldi, F.; Pandini, S.; Scalet, G.; Auricchio, F.; Cerea, M.; Foppoli, A.; et al. Expandable drug delivery system for gastric retention based on shape memory polymers: Development via 4D printing and extrusion. *International Journal of Pharmaceutics* **2019**, *571*, 118700, doi:10.1016/j.ijpharm.2019.118700.
56. Yang, Y.; Wang, H.; Li, H.; Ou, Z.; Yang, G. 3D printed tablets with internal scaffold structure using ethyl cellulose to achieve sustained ibuprofen release. *European Journal of Pharmaceutical Sciences* **2018**, *115*, 11–18, doi:10.1016/j.ejps.2018.01.005.
57. Okwuosa, T.C.; Pereira, B.C.; Arafat, B.; Cieszyńska, M.; Isreb, A.; Alhnan, M.A. Fabricating a Shell-Core Delayed Release Tablet Using Dual FDM 3D Printing for Patient-Centred Therapy. *Pharm Res* **2017**, *34*, 427–437, doi:10.1007/s11095-016-2073-3.
58. Costa, P.F.; Puga, A.M.; Díaz-Gomez, L.; Concheiro, A.; Busch, D.H.; Alvarez-Lorenzo, C. Additive manufacturing of scaffolds with dexamethasone controlled release for enhanced bone regeneration. *International Journal of Pharmaceutics* **2015**, *496*, 541–550, doi:10.1016/j.ijpharm.2015.10.055.
59. Eleftheriadis, G.K.; Ritzoulis, C.; Bouropoulos, N.; Tzetzis, D.; Andreadis, D.A.; Boetker, J.; Rantanen, J.; Fatouros, D.G. Unidirectional drug release from 3D printed mucoadhesive buccal films using FDM technology: In vitro and ex vivo evaluation. *European Journal of Pharmaceutics and Biopharmaceutics* **2019**, *144*, 180–192, doi:10.1016/j.ejpb.2019.09.018.
60. Pereira, B.C.; Isreb, A.; Forbes, R.T.; Dores, F.; Habashy, R.; Petit, J.-B.; Alhnan, M.A.; Oga, E.F. ‘Temporary Plasticiser’: A novel solution to fabricate 3D printed patient-centred cardiovascular ‘Polypill’ architectures. *European Journal of Pharmaceutics and Biopharmaceutics* **2019**, *135*, 94–103, doi:10.1016/j.ejpb.2018.12.009.
